# Supplementary material
Source: PubMed Central journal article supplement (PMC5805243)
Supplement: zsx167_suppl_supplemental_material.pdf [file zsx167_suppl_supplemental_material.pdf]

**Supplemental Material**

**Time-on-Task Effect during Sleep Deprivation in Healthy Young Adults Is Modulated by  
Dopamine Transporter Genotype**

Briann C. Satterfield, PhD<sup>a,b</sup>, Jonathan P. Wisor, PhD<sup>a</sup>, Michelle A. Schmidt, MS<sup>a</sup>,

Hans P.A. Van Dongen, PhD<sup>a</sup>

<sup>a</sup> Sleep and Performance Research Center and Elson S. Floyd College of Medicine, Washington  
State University, Spokane, WA, USA

<sup>b</sup> Currently at the Department of Psychiatry, College of Medicine, University of Arizona,  
Tucson, AZ, USA

**Table S1.** Subject demographics and genotypes for the three studies used for analysis. Subjects in a well-rested control group (used only in the supplemental material, Fig. S1) are indicated in parentheses. The TNF $\alpha$ 308 assay failed for 1 control subject, leaving 57 subjects for analysis. Note that DAT1 8/8 and 10/11 genotypes are included here for representation of our sample; these genotypes were excluded from analysis. SD: standard deviation.

|                                       | <b>Study 1</b><br><i>n</i> =34<br>( <i>n</i> =15) | <b>Study 2</b><br><i>n</i> =36<br>( <i>n</i> =30) | <b>Study 3</b><br><i>n</i> =12<br>( <i>n</i> =13) | <b>Total</b><br><i>N</i> =82<br>( <i>N</i> =58) |
|---------------------------------------|---------------------------------------------------|---------------------------------------------------|---------------------------------------------------|-------------------------------------------------|
| <b>Sex</b>                            |                                                   |                                                   |                                                   |                                                 |
| Female                                | 14 (9)                                            | 22 (12)                                           | 7 (3)                                             | 43 (24)                                         |
| Male                                  | 20 (6)                                            | 14 (18)                                           | 5 (10)                                            | 39 (34)                                         |
| <b>Age (mean <math>\pm</math> SD)</b> | 27.7 $\pm$ 5.0<br>(26.3 $\pm$ 4.3)                | 26.6 $\pm$ 4.8<br>(26.4 $\pm$ 4.9)                | 26.6 $\pm$ 4.4<br>(25.2 $\pm$ 3.8)                | 27.0 $\pm$ 4.8<br>(26.1 $\pm$ 4.5)              |
| <b>Race/Ethnicity</b>                 |                                                   |                                                   |                                                   |                                                 |
| Caucasian                             | 30 (14)                                           | 33 (30)                                           | 7 (10)                                            | 70 (53)                                         |
| Hispanic                              | 0 (0)                                             | 1 (0)                                             | 1 (0)                                             | 2 (0)                                           |
| African-American                      | 1 (0)                                             | 0 (0)                                             | 0 (0)                                             | 1 (0)                                           |
| Asian                                 | 0 (0)                                             | 0 (0)                                             | 1 (0)                                             | 1 (0)                                           |
| American Indian                       | 0 (0)                                             | 0 (0)                                             | 0 (1)                                             | 0 (1)                                           |
| Pacific Islander                      | 0 (0)                                             | 0 (0)                                             | 0 (1)                                             | 0 (1)                                           |
| Mixed                                 | 1 (1)                                             | 2 (0)                                             | 3 (1)                                             | 6 (2)                                           |
| Undisclosed                           | 2 (0)                                             | 0 (0)                                             | 0 (0)                                             | 2 (0)                                           |
| <b>DAT1</b>                           |                                                   |                                                   |                                                   |                                                 |
| 8/8                                   | 1 (1)                                             | 0 (0)                                             | 0 (0)                                             | 1 (1)                                           |
| 9/9                                   | 4 (0)                                             | 2 (3)                                             | 1 (1)                                             | 7 (4)                                           |
| 9/10                                  | 10 (4)                                            | 14 (12)                                           | 3 (2)                                             | 27 (18)                                         |
| 10/10                                 | 19 (10)                                           | 18 (15)                                           | 8 (10)                                            | 45 (35)                                         |
| 10/11                                 | 0 (0)                                             | 2 (0)                                             | 0 (0)                                             | 2 (0)                                           |
| <b>COMT</b>                           |                                                   |                                                   |                                                   |                                                 |
| Met/Met                               | 9 (3)                                             | 7 (11)                                            | 1 (2)                                             | 17 (16)                                         |
| Val/Met                               | 19 (9)                                            | 21 (12)                                           | 6 (8)                                             | 46 (29)                                         |
| Val/Val                               | 6 (3)                                             | 8 (7)                                             | 5 (3)                                             | 19 (13)                                         |
| <b>TNF<math>\alpha</math></b>         |                                                   |                                                   |                                                   |                                                 |
| A/A                                   | 0 (0)                                             | 0 (0)                                             | 0 (0)                                             | 0 (0)                                           |
| A/G                                   | 8 (5)                                             | 14 (7)                                            | 2 (3)                                             | 24 (15)                                         |
| G/G                                   | 26 (10)                                           | 22 (22)                                           | 10 (10)                                           | 58 (42)                                         |

**Table S2.** Descriptive statistics for number of responses in each 1 min bin of the 10 min PVT.

SD: standard deviation.

| <b>Bin</b> | <b>Minimum</b> | <b>Median</b> | <b>Maximum</b> | <b>Mean</b> | <b>SD</b> |
|------------|----------------|---------------|----------------|-------------|-----------|
| 1          | 6              | 9             | 13             | 9.08        | 1.19      |
| 2          | 7              | 9             | 14             | 9.43        | 1.19      |
| 3          | 6              | 9             | 13             | 9.32        | 1.14      |
| 4          | 6              | 9             | 14             | 9.42        | 1.26      |
| 5          | 6              | 9             | 13             | 9.31        | 1.20      |
| 6          | 5              | 9             | 14             | 9.33        | 1.19      |
| 7          | 6              | 9             | 13             | 9.29        | 1.22      |
| 8          | 6              | 9             | 14             | 9.31        | 1.21      |
| 9          | 4              | 9             | 14             | 9.24        | 1.17      |
| 10         | 6              | 9             | 13             | 9.28        | 1.14      |

**Table S3.** Summary of statistical results for the TSD group discussed in the main text. Bold indicates statistical significance ( $P < 0.05$ ). df: degrees of freedom; RT: response time; TOT: time on task; TSD: total sleep deprivation.

|                                 | DAT1         |           |                | COMT                |            |                | TNF $\alpha$ |           |                |
|---------------------------------|--------------|-----------|----------------|---------------------|------------|----------------|--------------|-----------|----------------|
|                                 | $\chi^2 / F$ | df        | P              | $\chi^2 / F$        | df         | P              | $\chi^2 / F$ | df        | P              |
| <b>Genotype Analyses</b>        |              |           |                |                     |            |                |              |           |                |
| Gender                          | <0.01        | 1         | 0.97           | 1.15                | 2          | 0.56           | 0.59         | 1         | 0.44           |
| Race/Ethnicity                  | 2.01         | 1         | 0.16           | 1.59                | 2          | 0.45           | 2.22         | 1         | 0.14           |
| Age ( <i>F</i> test)            | <0.01        | 1, 77     | 0.95           | 1.43                | 2, 79      | 0.25           | 0.81         | 1, 80     | 0.37           |
| Sleep Duration ( <i>F</i> test) | 0.10         | 1, 77     | 0.75           | 0.29                | 2, 79      | 0.75           | 0.14         | 1, 80     | 0.71           |
| <b>Time-on-Task Analyses</b>    |              |           |                |                     |            |                |              |           |                |
|                                 | <i>F</i>     | df        | P              | <i>F</i>            | df         | P              | <i>F</i>     | df        | P              |
| Time Awake (bout)               | 321.66       | 11, 86772 | < <b>0.001</b> | 223.02              | 11, 90055  | < <b>0.001</b> | 296.57       | 11, 90174 | < <b>0.001</b> |
| TOT (bin)                       | 81.01        | 9, 86772  | < <b>0.001</b> | 54.59               | 9, 90055   | < <b>0.001</b> | 75.33        | 9, 90174  | < <b>0.001</b> |
| Genotype                        | 3.18         | 1, 86772  | 0.075          | 1.04                | 2, 90055   | 0.352          | 1.52         | 1, 90174  | 0.217          |
| Time Awake x TOT                | 7.56         | 99, 86772 | < <b>0.001</b> | 4.9                 | 99, 90055  | < <b>0.001</b> | 7.01         | 99, 90174 | < <b>0.001</b> |
| Time Awake x Genotype           | 21.9         | 11,86772  | < <b>0.001</b> | 9.2                 | 22, 90055  | < <b>0.001</b> | 9.20         | 11, 90174 | < <b>0.001</b> |
| TOT x Genotype                  | 3.07         | 9, 86772  | <b>0.001</b>   | 2.93                | 18, 90055  | < <b>0.001</b> | 2.16         | 9, 90174  | <b>0.022</b>   |
| Time Awake x TOT x Genotype     | 1.35         | 99, 86772 | <b>0.011</b>   | 1.13                | 198, 90055 | 0.103          | 1.21         | 99, 90174 | 0.08           |
| Study                           | 2.86         | 2, 86772  | 0.057          | 2.09                | 2, 90055   | 0.124          | 2.55         | 2, 90174  | 0.078          |
| <b>RT Distribution Analyses</b> |              |           |                |                     |            |                |              |           |                |
|                                 | <i>F</i>     | df        | P              | <i>F</i>            | df         | P              | <i>F</i>     | df        | P              |
| <i>Baseline</i>                 |              |           |                |                     |            |                |              |           |                |
| RT bin                          | 4353.28      | 27, 4235  | < <b>0.001</b> | 3664.3 <sub>3</sub> | 27, 4345   | < <b>0.001</b> | 3869.53      | 27, 4400  | < <b>0.001</b> |
| RT bin x 5 min block            | 2.95         | 28, 4235  | < <b>0.001</b> | 2.02                | 28, 4235   | <b>0.001</b>   | 3.02         | 28, 4400  | < <b>0.001</b> |
| RT bin x Genotype               | 0.54         | 28, 4235  | 0.976          | 2.24                | 56, 4235   | < <b>0.001</b> | 15.76        | 28, 4400  | < <b>0.001</b> |
| RT bin x 5 min block x Genotype | 0.05         | 28, 4235  | >0.999         | 0.17                | 56, 4345   | >0.999         | 0.09         | 28, 4400  | >0.999         |
| Study                           | 0.68         | 2, 4235   | 0.508          | 1.36                | 2, 4345    | 0.258          | 0.42         | 2, 4400   | 0.655          |
| <i>Daytime TSD</i>              |              |           |                |                     |            |                |              |           |                |
| RT bin                          | 4804.49      | 27, 4235  | < <b>0.001</b> | 4134                | 27, 4345   | < <b>0.001</b> | 4213.75      | 27, 4400  | < <b>0.001</b> |
| RT bin x 5 min block            | 17.99        | 28, 4235  | < <b>0.001</b> | 16.17               | 28, 4345   | < <b>0.001</b> | 17.72        | 28, 4400  | < <b>0.001</b> |
| RT bin x Genotype               | 1.6          | 28, 4235  | <b>0.022</b>   | 1.73                | 56, 4345   | <b>0.001</b>   | 3.37         | 28, 4400  | < <b>0.001</b> |
| RT bin x 5 min block x Genotype | 0.15         | 28, 4235  | >0.999         | 0.11                | 56, 4345   | >0.999         | 0.34         | 28, 4400  | >0.999         |
| Study                           | 1.58         | 2, 4235   | 0.206          | 1.07                | 2, 4345    | 0.344          | 1.51         | 2, 4400   | 0.222          |

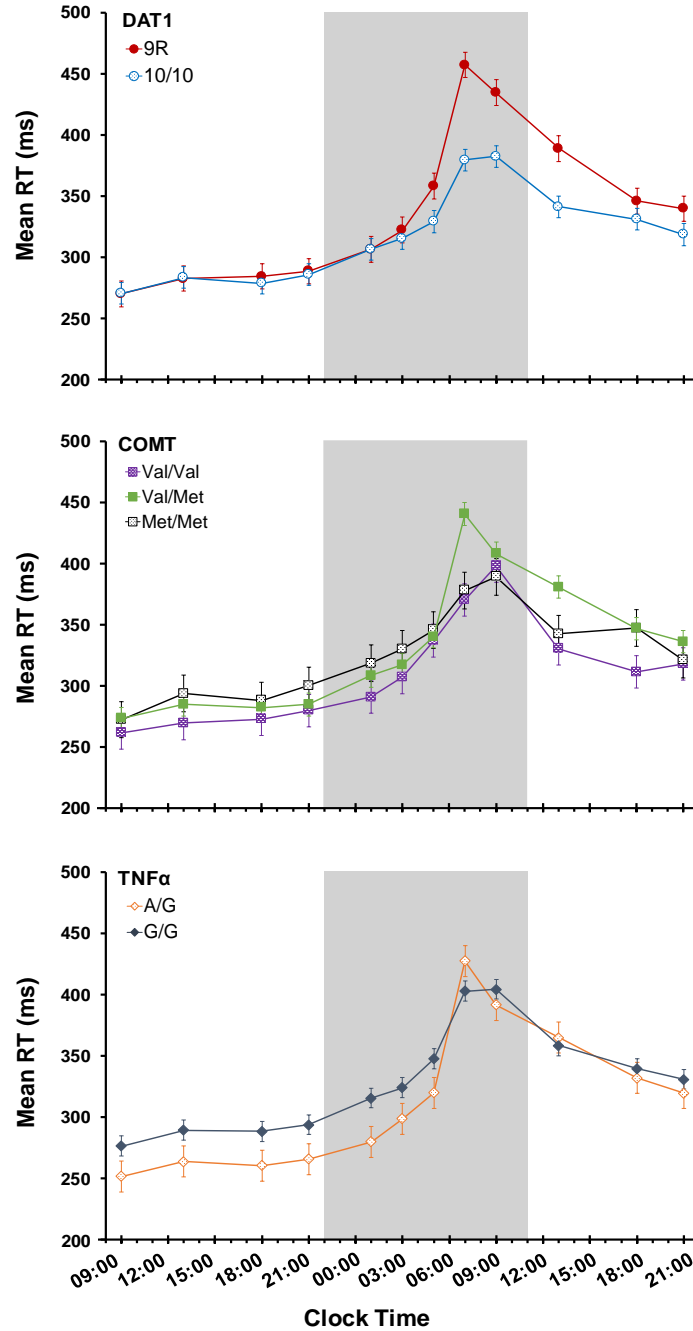

**Figure S1.** Mean RT ( $\pm$  standard error) on the 10 min PVT across test bouts during 38 h of TSD, for each of the three genes, collapsed across TOT. Shaded area: nighttime test bouts during TSD. PVT: psychomotor vigilance test; RT: response time; TOT: time-one-task; TSD: total sleep deprivation.

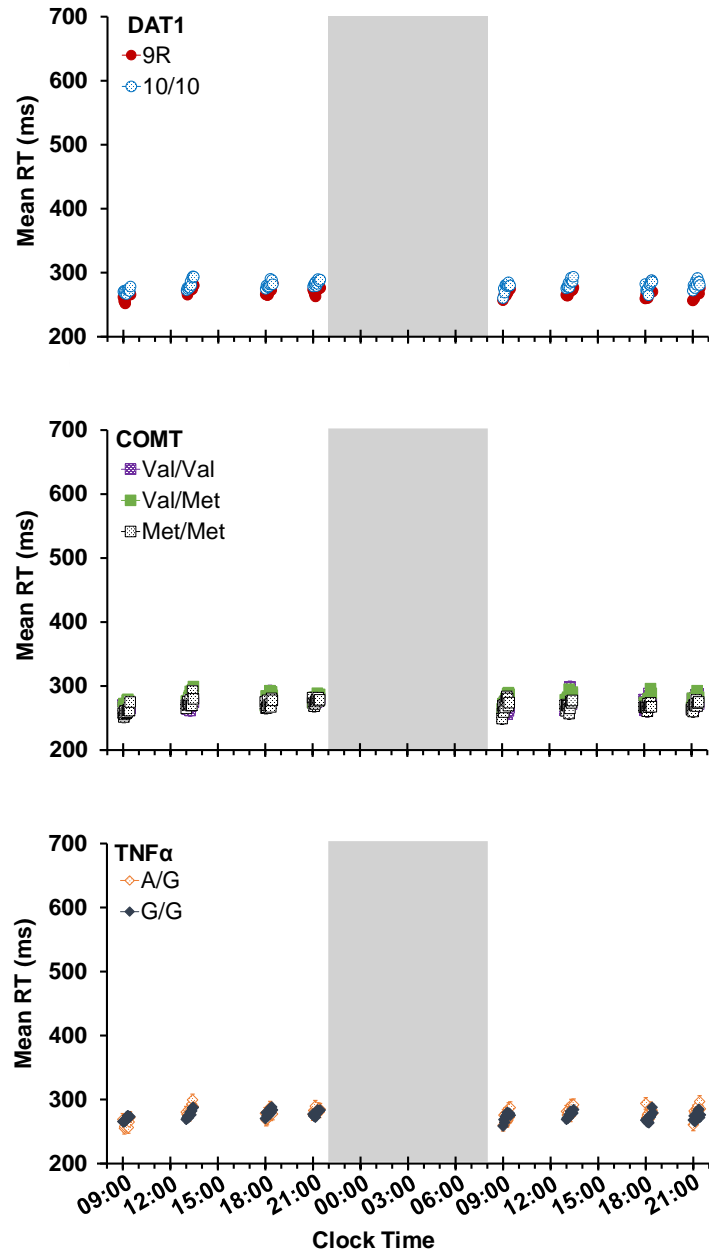

**Figure S2.** Mean RT ( $\pm$  standard error) in 1 min bins on the 10 min PVT across test bouts in the well-rested control group, for each of the three genes. Data are plotted against the start times of the PVT bouts; placement of the 1 min bins in each test bout is not to scale on the clock time axis. The shaded area represents a nighttime sleep opportunity (22:00–08:00).

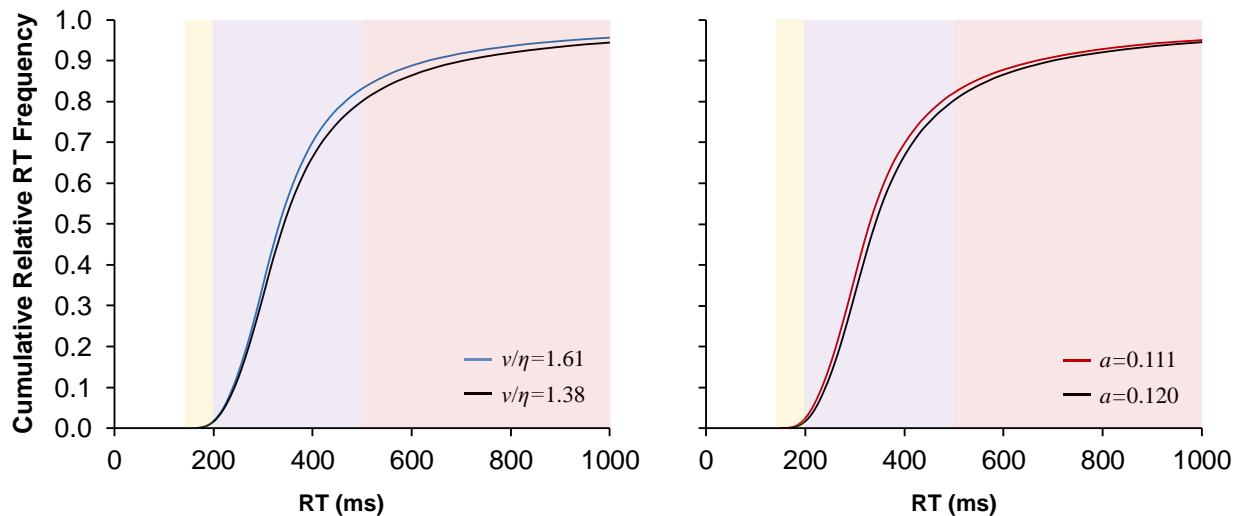

**Figure S3.** Computer simulations of cumulative relative RT frequency distributions using the diffusion model for the PVT.<sup>37</sup> These simulations are based on model parameters fixed at values previously observed for TSD (Table S1 in the PVT diffusion model publication<sup>37</sup>) but with varying drift ratio  $v/\eta$  (left panel) or boundary separation  $a$  (right panel). In the left panel, resilience to performance impairment is simulated by changing drift ratio from  $v/\eta=1.38$  (previously observed TSD value) to  $v/\eta=1.61$  (20% toward previously observed baseline value). This manipulation affects RTs in the lapse domain of the distribution (red-shaded area). In the right panel, resilience to performance impairment is simulated by changing boundary separation from  $a=0.120$  (previously observed TSD value) to  $a=0.111$  (previously observed baseline value). This manipulation primarily affects RTs in the heart of the distribution (purple-shaded area). The yellow-shaded area contains the fastest RTs; the purple-shaded area shows the heart of the cumulative relative frequency distributions; and the red-shaded area shows the slower RTs or lapse domain (cf. Fig. 1, right).
